# Supplementary material
Source: publisher site journal article supplement (http://kjim.org/upload/media/kjim-2018-355-suppl2.pdf)
Supplement: Supplementary file 1 [file kjim-2018-355-suppl2.pdf]

**Supplementary Table 2. The Korean version of the Wisconsin Smoking Withdrawal Scale (WSWS-K) (한국어판 위스콘신 금단 증상 척도)**

| 아래의 문항에 대해 어떻게 느꼈는지 표시해주세요                |        |      |     |        |
|-------------------------------------------|--------|------|-----|--------|
| 0                                         | 1      | 2    | 3   | 4      |
| 전혀 그렇지 않다                                 | 그렇지 않다 | 보통이다 | 그렇다 | 매우 그렇다 |
| 1. 나는 입맛이 없다. <sup>a</sup>                |        |      | ( ) |        |
| 2. 나는 편안한 숙면을 취한다. <sup>a</sup>           |        |      | ( ) |        |
| 3. 나는 긴장되거나 불안하다                          |        |      | ( ) |        |
| 4. 나의 집중력은 우수하다. <sup>a</sup>             |        |      | ( ) |        |
| 5. 나는 밤에 자다가 자주 깬다.                       |        |      | ( ) |        |
| 6. 나는 참을성이 없다.                            |        |      | ( ) |        |
| 7. 나는 긍정적이고 낙관적이다. <sup>a</sup>           |        |      | ( ) |        |
| 8. 나는 내 문제에 대해 걱정이 많다.                    |        |      | ( ) |        |
| 9. 나는 자주 담배 충동을 느끼곤 한다.                   |        |      | ( ) |        |
| 10. 나는 최근 침착하다. <sup>a</sup>              |        |      | ( ) |        |
| 11. 나는 담배를 피우고 싶은 마음 때문에 성가시다.            |        |      | ( ) |        |
| 12. 나는 슬프거나 우울하다                          |        |      | ( ) |        |
| 13. 나는 짜증이 나고, 쉽게 화가 난다.                  |        |      | ( ) |        |
| 14. 나는 과자나 군것질거리를 먹고 싶다.                  |        |      | ( ) |        |
| 15. 나는 화, 우울, 짜증 등의 부정적인 감정 때문에 괴롭다.      |        |      | ( ) |        |
| 16. 나는 최근 많이 먹는다.                         |        |      | ( ) |        |
| 17. 나는 나의 수면에 만족한다. <sup>a</sup>          |        |      | ( ) |        |
| 18. 나는 좌절감을 느낀다.                          |        |      | ( ) |        |
| 19. 나는 낙담하거나 희망이 없는 것처럼 느낀다.              |        |      | ( ) |        |
| 20. 나는 담배에 대해 자주 생각한다.                    |        |      | ( ) |        |
| 21. 나는 배고픔을 느낀다.                          |        |      | ( ) |        |
| 22. 나는 충분한 양의 수면을 취한다고 생각한다. <sup>a</sup> |        |      | ( ) |        |
| 23. 나는 집중하기 어렵다.                          |        |      | ( ) |        |
| 24. 나는 행복하고 만족한다. <sup>a</sup>            |        |      | ( ) |        |
| 25. 나는 수면을 잘 취하지 못한다.                     |        |      | ( ) |        |
| 26. 나는 담배에 대한 생각을 떨쳐내기가 힘들다.              |        |      | ( ) |        |
| 27. 나는 명확하게 생각하는 것이 힘이 든다.                |        |      | ( ) |        |
| 28. 나는 음식에 대한 생각을 자주 한다.                  |        |      | ( ) |        |

<sup>a</sup>역산문항.
